# Supplementary material for: Inhibition of glutaminolysis restores mitochondrial function in senescent stem cells
Source: PubMed Central journal article supplement — Cell Rep. Author manuscript; Available in PMC 2023 Jan 3. (PMC9809151; doi:10.1016/j.celrep.2022.111744), 2022-11-29
Supplement: NIHMS1854089-supplement-1.pdf [file NIHMS1854089-supplement-1.pdf]

**Cell Reports, Volume 41**

**Supplemental information**

**Inhibition of glutaminolysis restores  
mitochondrial function in senescent stem cells**

**Debanik Choudhury, Na Rong, Izuagie Ikhapoh, Nika Rajabian, Georgios Tseropoulos, Yulun Wu, Pihu Mehrotra, Ramkumar Thiyagarajan, Aref Shahini, Kenneth L. Seldeen, Bruce R. Troen, Pedro Lei, and Stelios T. Andreadis**

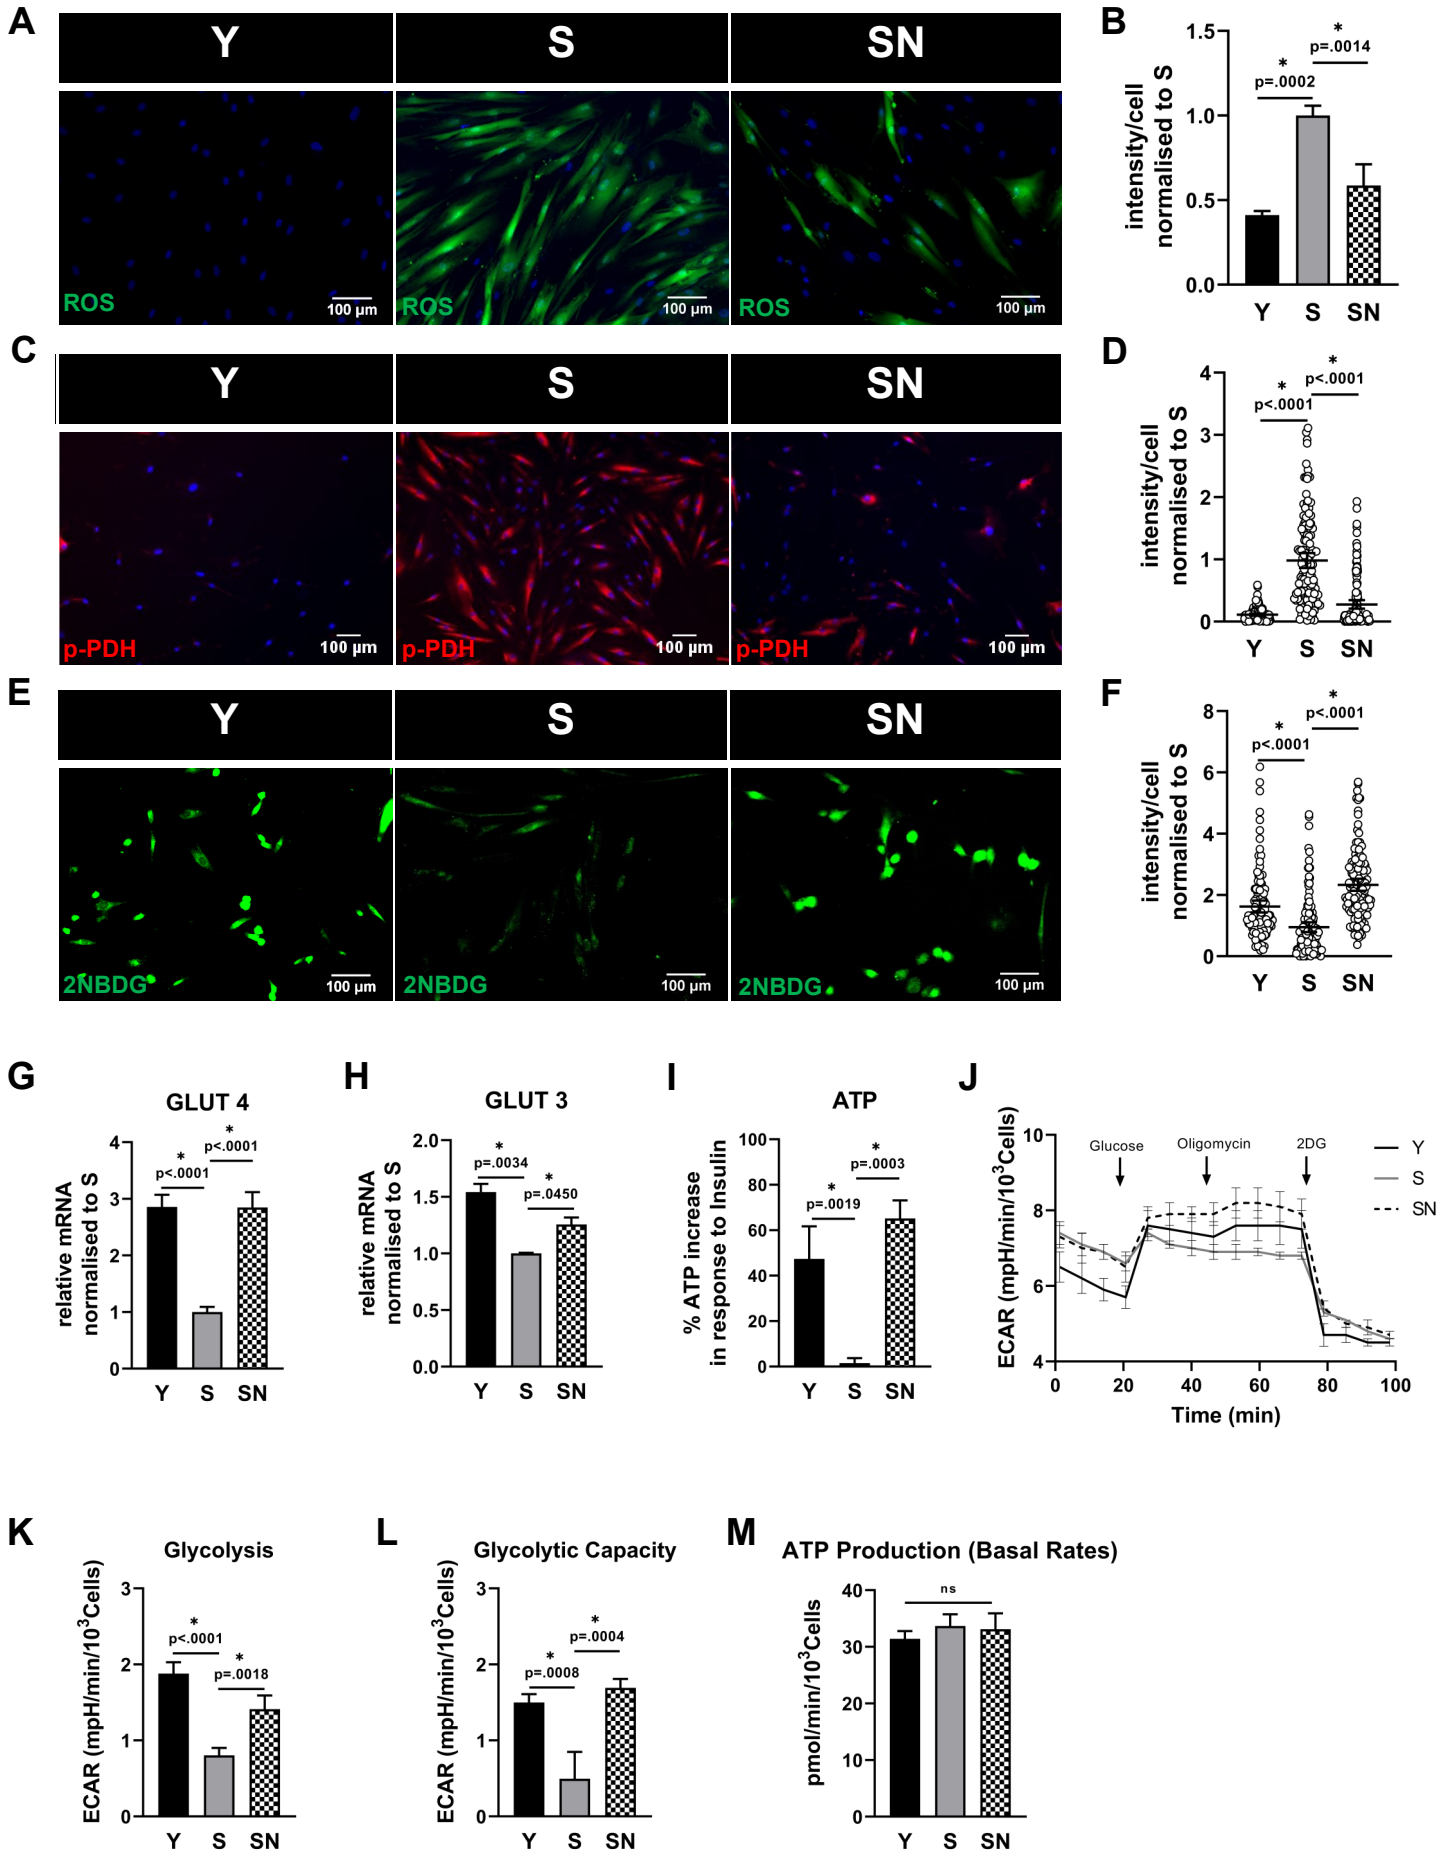

**Figure S1. Senescent MSCs demonstrate reduced glycolysis. Related to Figure 1.**

(A-B) Live stain images of reactive oxygen species (ROS) and quantification in Y, S and SN cells, using DCFDA dye; data shown as mean  $\pm$  SD. (C) Immunostaining for p-PDH; scale bar=100 $\mu$ m. (D) Quantification of p-PDH intensity per cell, normalised to S; data shown as mean  $\pm$  95%CI for >100 cells. (E) Live stain images of 2-NBDG uptake, a fluorescent glucose analog; scale bar=100  $\mu$ m. (F) Quantification of 2-NBDG intensity per cell, normalised to S; data shown as mean  $\pm$  95%CI for >100 cells. (G-H) Quantification of gene expression of glucose transporters, *GLUT4* and *GLUT3* via quantitative PCR normalised to S and internally normalised to *RPL32* cycle number; data shown as mean  $\pm$  SD. (I) Intracellular ATP concentration measured after treatment with 100nM insulin for 24 hours; data represented as percentage increase in ATP concentration in response to insulin, shown as mean  $\pm$  SD. (J-L) Measurement of extracellular acidification rate (ECAR) using seahorse analyzer and calculations of glycolysis and glycolytic capacity from glucose administration based ECAR data, demonstrating reduced glycolysis in senescent MSCs. (M) ATP production rate in Y, S, SN cells from ATP rate assay using seahorse flux analyzer. ns denotes not significant.

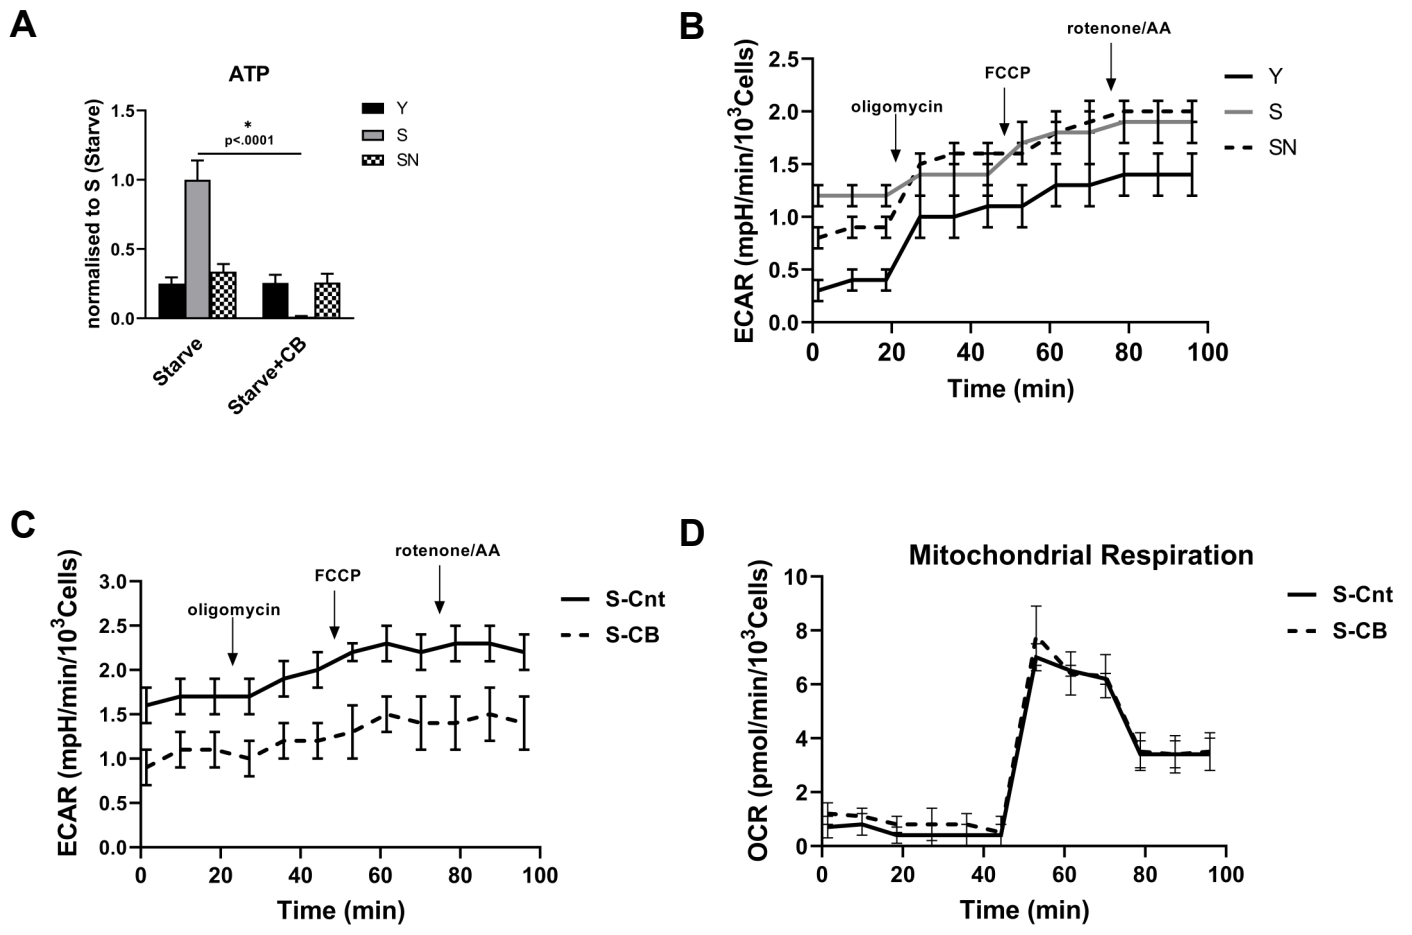

**Figure S2. Blockade of GLS activity decreases ATP in senescent MSCs. Related to Figure 2.**

(A) Intracellular ATP concentration measurement after starving Y, S and SN cells, without or without CB-839 (4 $\mu$ M) for 24hrs; data shown as mean  $\pm$  SD. (B) Measurement of Extracellular Acidification Rate (ECAR) using seahorse analyzer after sequential addition of oligomycin, FCCP and rotenone/AA. (C) Measurement of ECAR in S cells after 24hours of treatment with CB-839 (4 $\mu$ M). (D) Measurement of oxygen consumption (OCR) using Seahorse extracellular flux analyzer in S cells after 24hrs treatment with CB-839 (4 $\mu$ M).

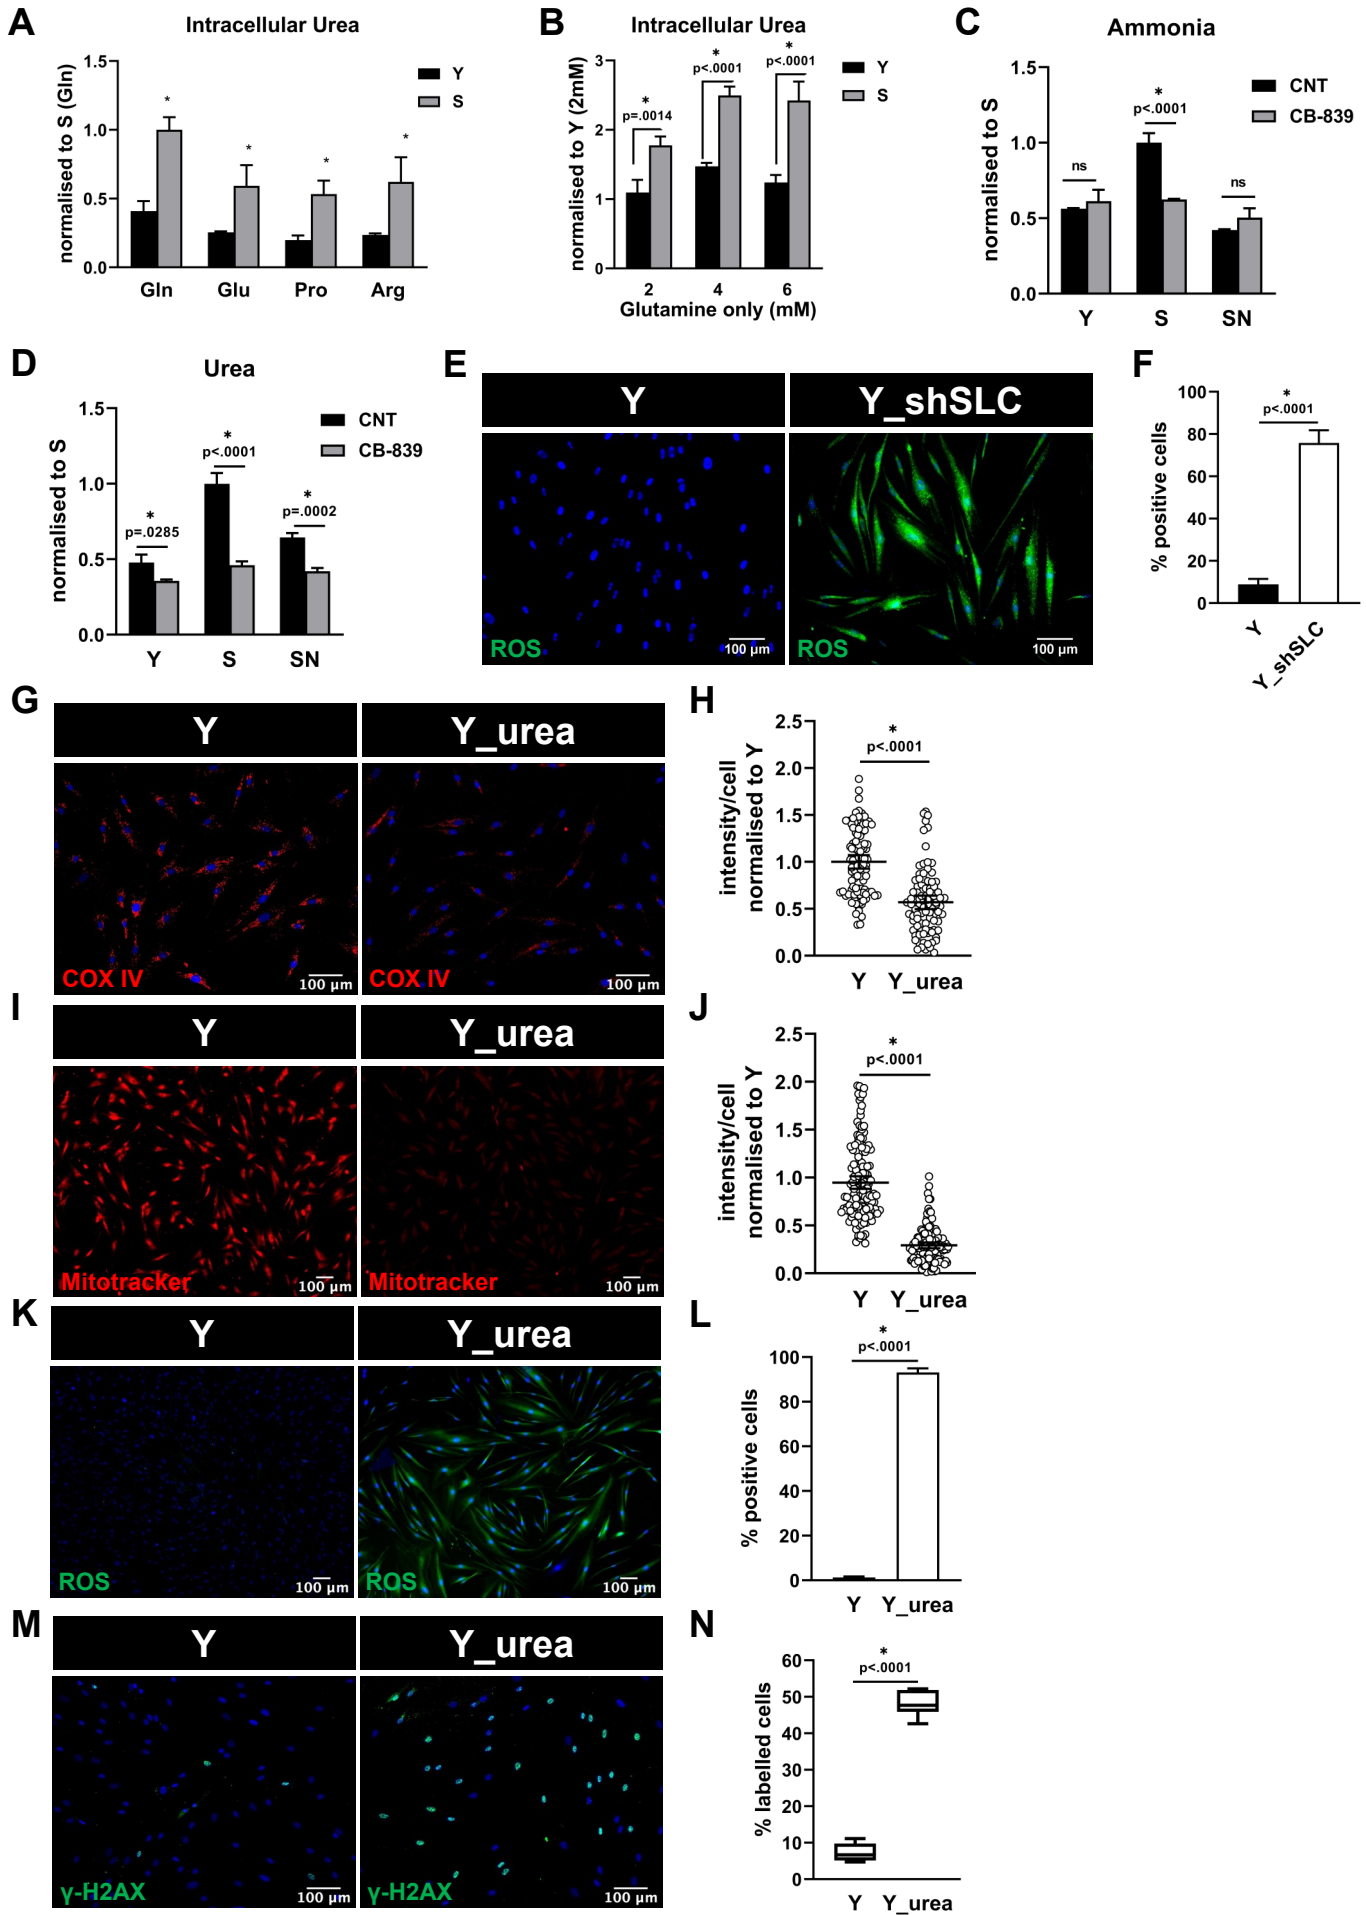

**Figure S3. Glutamine contributes to urea accumulation in senescent cells, leading to manifestation of mitochondrial defect and aging hallmarks. Related to Figure 3.**

(A) Intracellular urea measurement in Y and S cells after treatment with 2mM amino acids for 24hours; data normalised to S cells fed with glutamine; data shown as mean  $\pm$  SD. \* denotes  $p < .05$  as compared to Y. (B) Intracellular urea measurement after cells were fed with different dosage of glutamine; data normalised to Y cells fed with 2mM glutamine; data shown as mean  $\pm$  SD. (C) Intracellular Ammonia measurement in Y, S and SN cells with CB-839 treatment for 24hrs and without treatment (CNT); data normalised to S (CNT); data shown as mean  $\pm$  SD. (D) Measurement of intracellular urea concentration with CB-839 treatment for 24hrs and without treatment (CNT); data normalised to S (CNT); data shown as mean  $\pm$  SD. (E) Reactive oxygen species (ROS) was measured using DCFDA dye. (F) Quantification percentage of cells positive for ROS; data shown as mean  $\pm$  SD,  $n > 200$  cells in 10 fields of view. (G-N) Y\_urea denotes Y cells treated with 1 mM urea for 7days. (G) Immunostaining for COX IV, scale bar=100  $\mu$ m; (H) Quantification of COX IV intensity per cell, normalised to Y; data shown as mean  $\pm$  95%CI for  $>100$  cells. (I) Live stain images of Mitotracker Red, scale bar=100  $\mu$ m. (J) Quantification of Mitotracker Red intensity per cell normalised to Y; data shown as mean  $\pm$  95%CI for  $>100$  cells. (K) Live stain for ROS, using DCFDA dye, scale bar=100 $\mu$ m. (L) Quantification percentage of cells positive for ROS; data shown as mean  $\pm$  SD,  $n > 200$  cells in 10 fields of view. (M) Immunostaining for  $\gamma$ -H2AX, a measure of DNA damage, scale bar=100 $\mu$ m. (N) Quantification percentage of cells positive for  $\gamma$ -H2AX; data shown as mean  $\pm$  SD,  $n > 200$  cells in 10 fields of view.

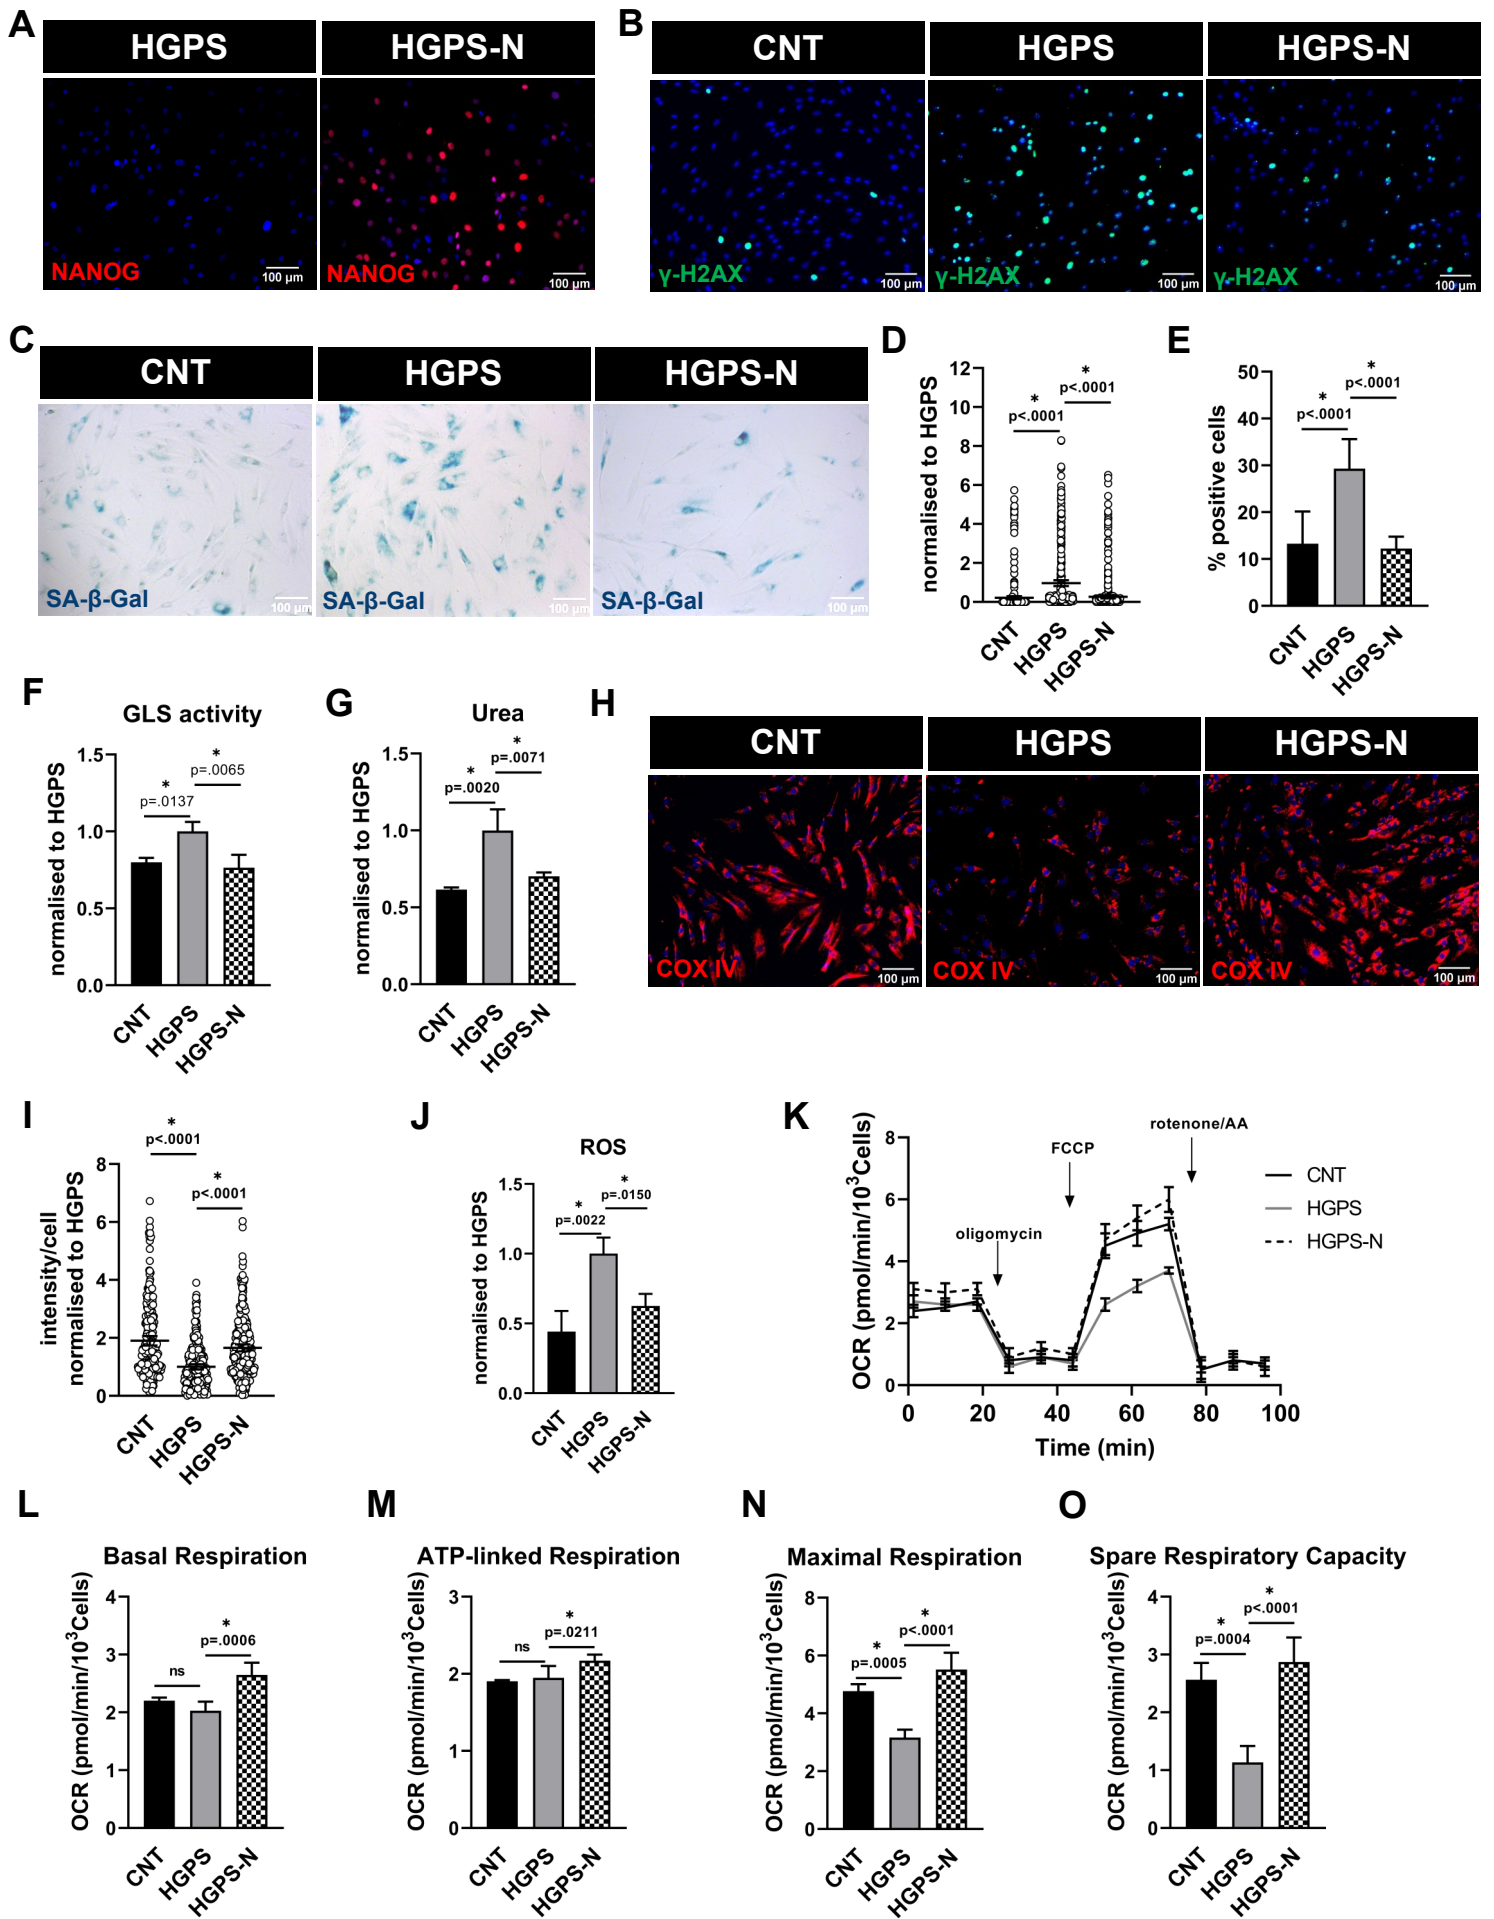

**Figure S4: Fibroblasts from progeria patients demonstrate aging hallmarks. Related to Figure 3.**

(A) Immunostaining for NANOG expression and nuclear localization upon addition of DOX in the medium of NANOG transduced cells. Scale bar=100 $\mu$ m. (B) Immunostaining for  $\gamma$ -H2AX, scale bar=100 $\mu$ m. (C) Representative images of SA- $\beta$ -gal staining in CNT, HGPS, HGPS-N cells. (D) Quantification of  $\gamma$ -H2AX intensity per cell, normalised to HGPS; data shown as mean  $\pm$  95%CI for >100 cells. (E) Percentage of senescent cells shown by SA- $\beta$ -gal staining and quantification; data presented as mean  $\pm$  SD, n = 3 independent experiments. (F) Measurement of glutaminase activity, data shown as mean  $\pm$  SD. (G) Intracellular urea concentration, normalised to HGPS; data shown as mean  $\pm$  SD. (H) Immunostaining for mitochondrial complex IV (COX IV), scale bar=100 $\mu$ m. (I) Quantification of COX IV intensity per cell. Data shown as mean  $\pm$  95%CI for >200 cells. (J) Measurement of ROS using DCFDA dye; data shown as mean  $\pm$  SD. (K) Measurement of oxygen consumption (OCR) using Seahorse extracellular flux analyzer. (L-O) Basal Respiration (L), ATP-linked Respiration (M), Maximal Respiration (N) and Spare Respiratory Capacity (O) rates calculated from the OCR data in (K). Nomenclature: CNT= healthy fibroblasts from the father of the HGPS patient, HGPS= fibroblasts from patient with HGPS syndrome, HGPS-N= HGPS fibroblasts expressing NANOG upon Dox administration.



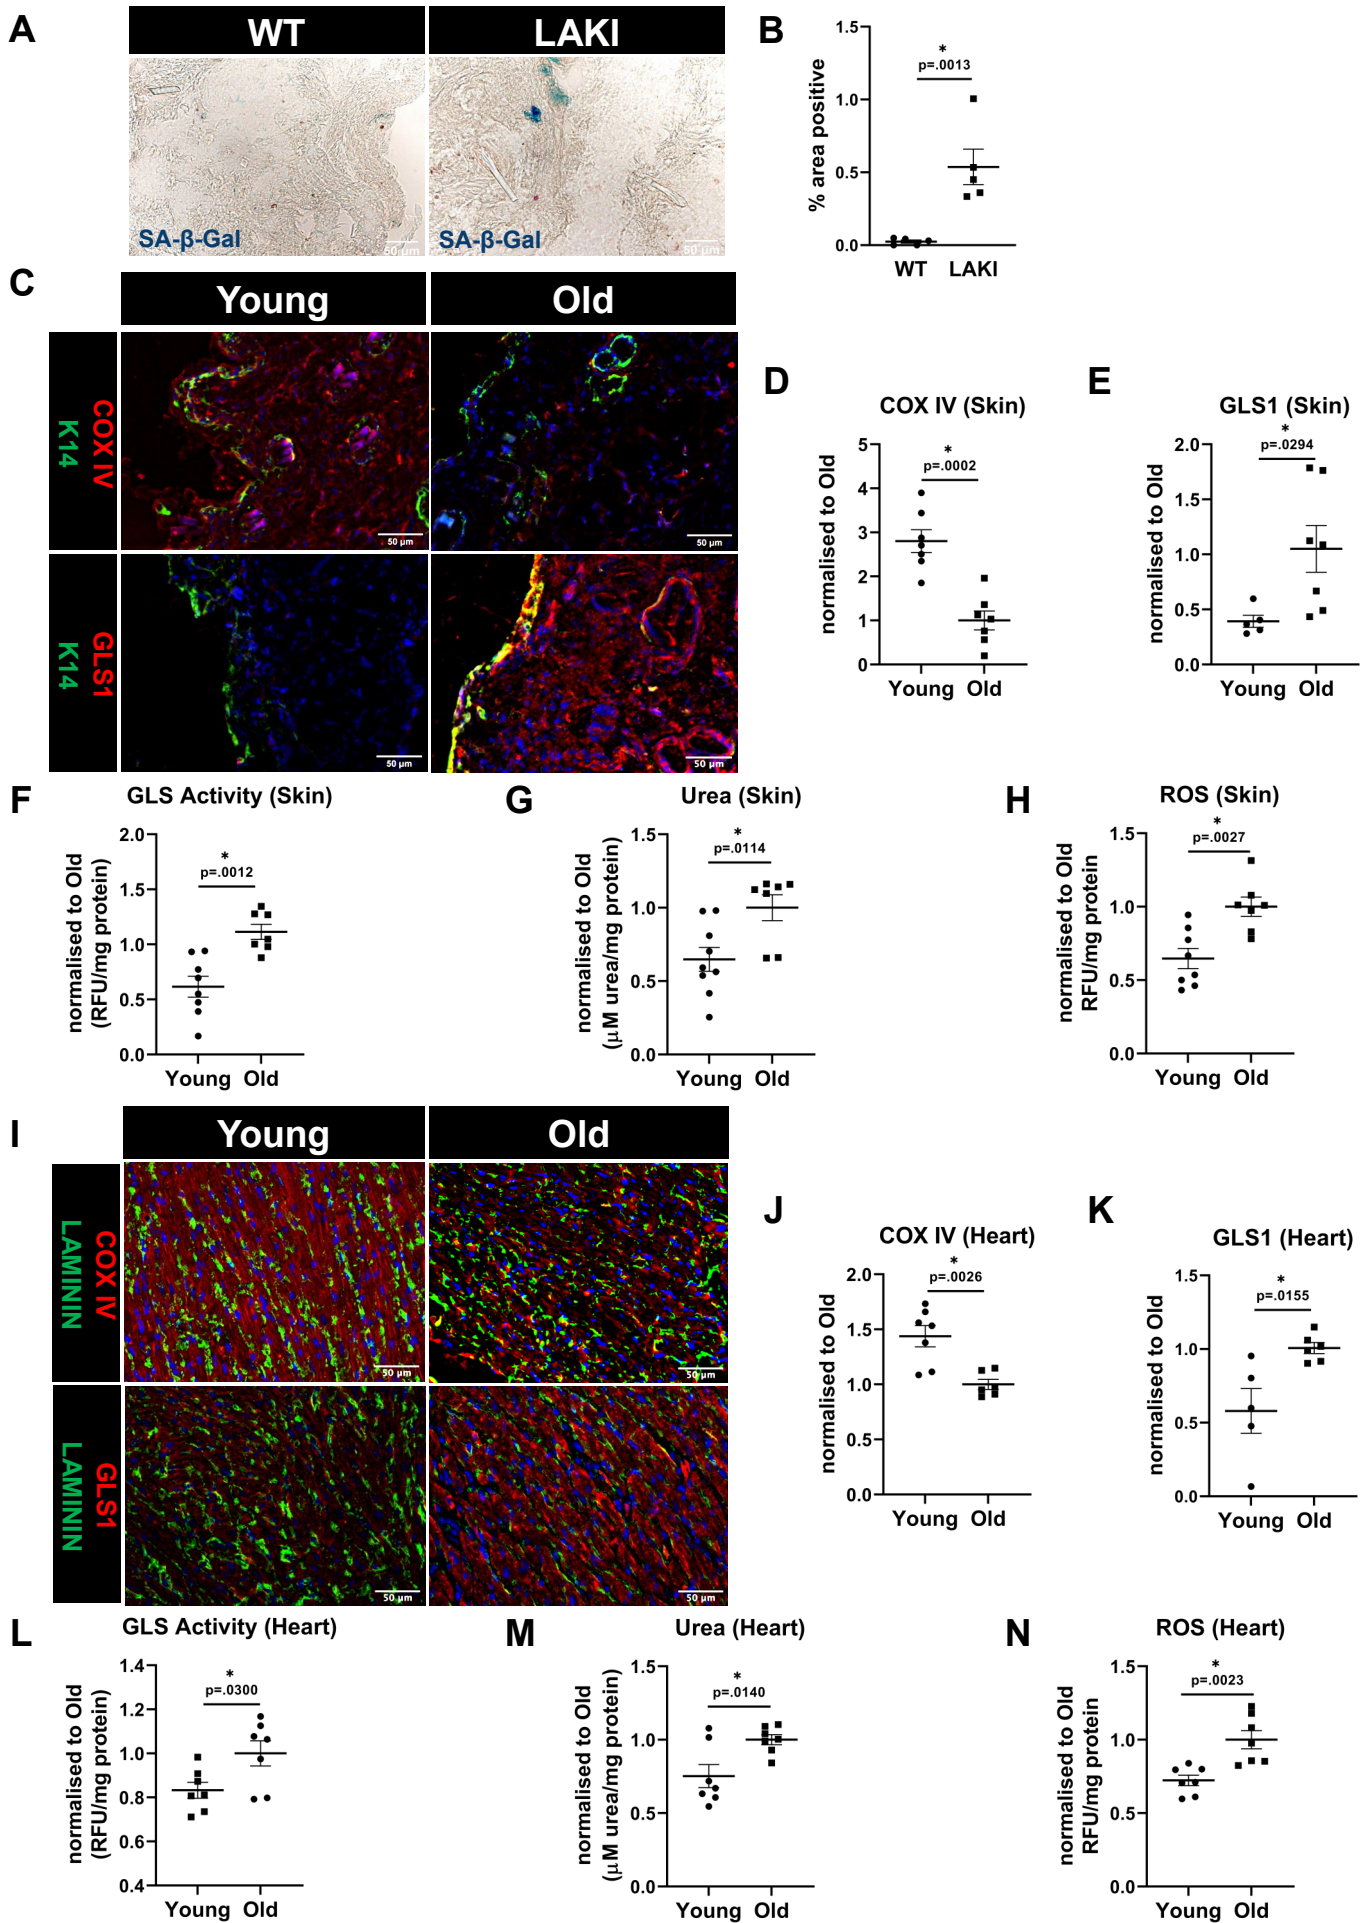

**Figure S5. Increasing urea production accompanied with less COX IV in aged mice. Related to Figure 4.**

(A) SA- $\beta$ -GAL staining and (B) quantification in skin of WT and heterozygous LAKI progeria mouse (LMNAG609G/+) at the age of 10 months. Representative immunostaining images and their quantification for COX IV and GLS1 in mouse skin (C-E) and heart tissue (I-K). GLS activity (F, L), Urea concentration (G, M) and ROS level (H, N) were evaluated in skin and heart of old and young mice. Young mice: 4-months-old mice; Old mice: 19-24 months old. Data shown as mean  $\pm$  SE for each cohort of animals (each bubble represents a mouse, n=5-9). \*: designates statistical significance as compared to LAKI with  $p < 0.05$ .

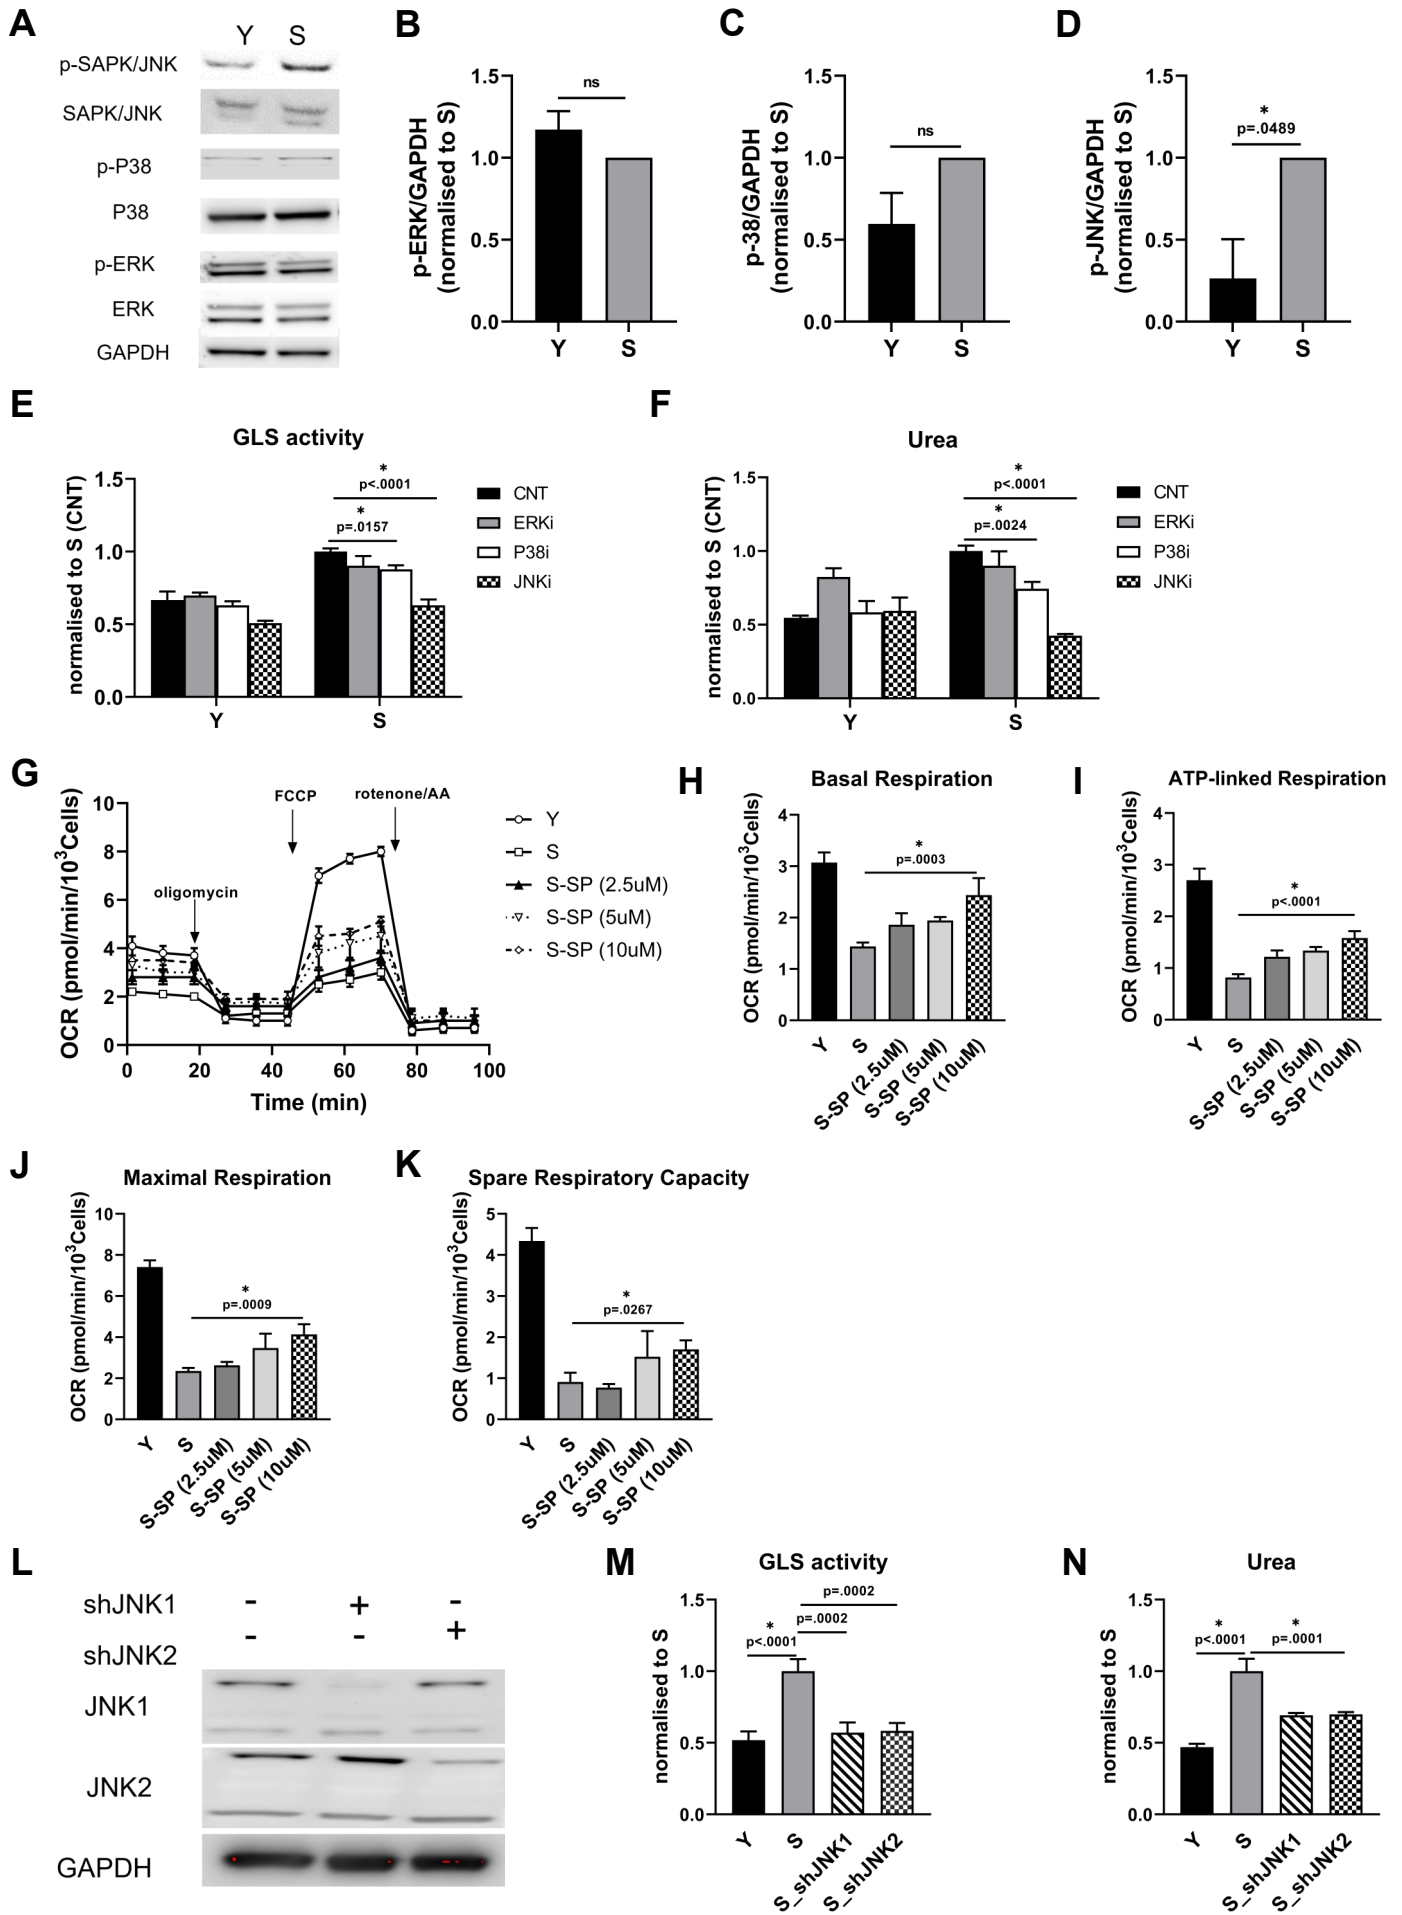

**Figure S6. JNK regulates glutaminase activity and mitochondrial function in senescent MSCs. Related to Figure 5.**

(A-D) Western Blot analysis and quantification for the expression and phosphorylation of P38, ERK and JNK in Y and S cells show significant upregulation of p-JNK in S cells. GAPDH served as a loading control. Data normalised to S and represented as mean  $\pm$  SD from 3 independent experiments. (E) Glutaminase activity and (F) urea concentration measurement with/without treatment of ERK, P38 and JNK inhibitors for 24 hrs. (G) Measurement of oxygen consumption (OCR) using Seahorse extracellular flux analyzer. S cells treated with SP600125 for 6 days (H-K) Calculations of Basal Respiration, ATP-linked Respiration, Maximal Respiration and Spare Respiratory Capacity rates based on OCR data. (L) Knockdown efficacy of JNK1 and JNK2 was characterized by Western blot analysis in senescent hf-MSC. (M) Glutaminase activity measurement in Y, S, JNK1 and JNK2 knockdown cells; data shown as mean  $\pm$  SD. (N) Intracellular urea measurement, normalised to S; data shown as mean  $\pm$  SD.

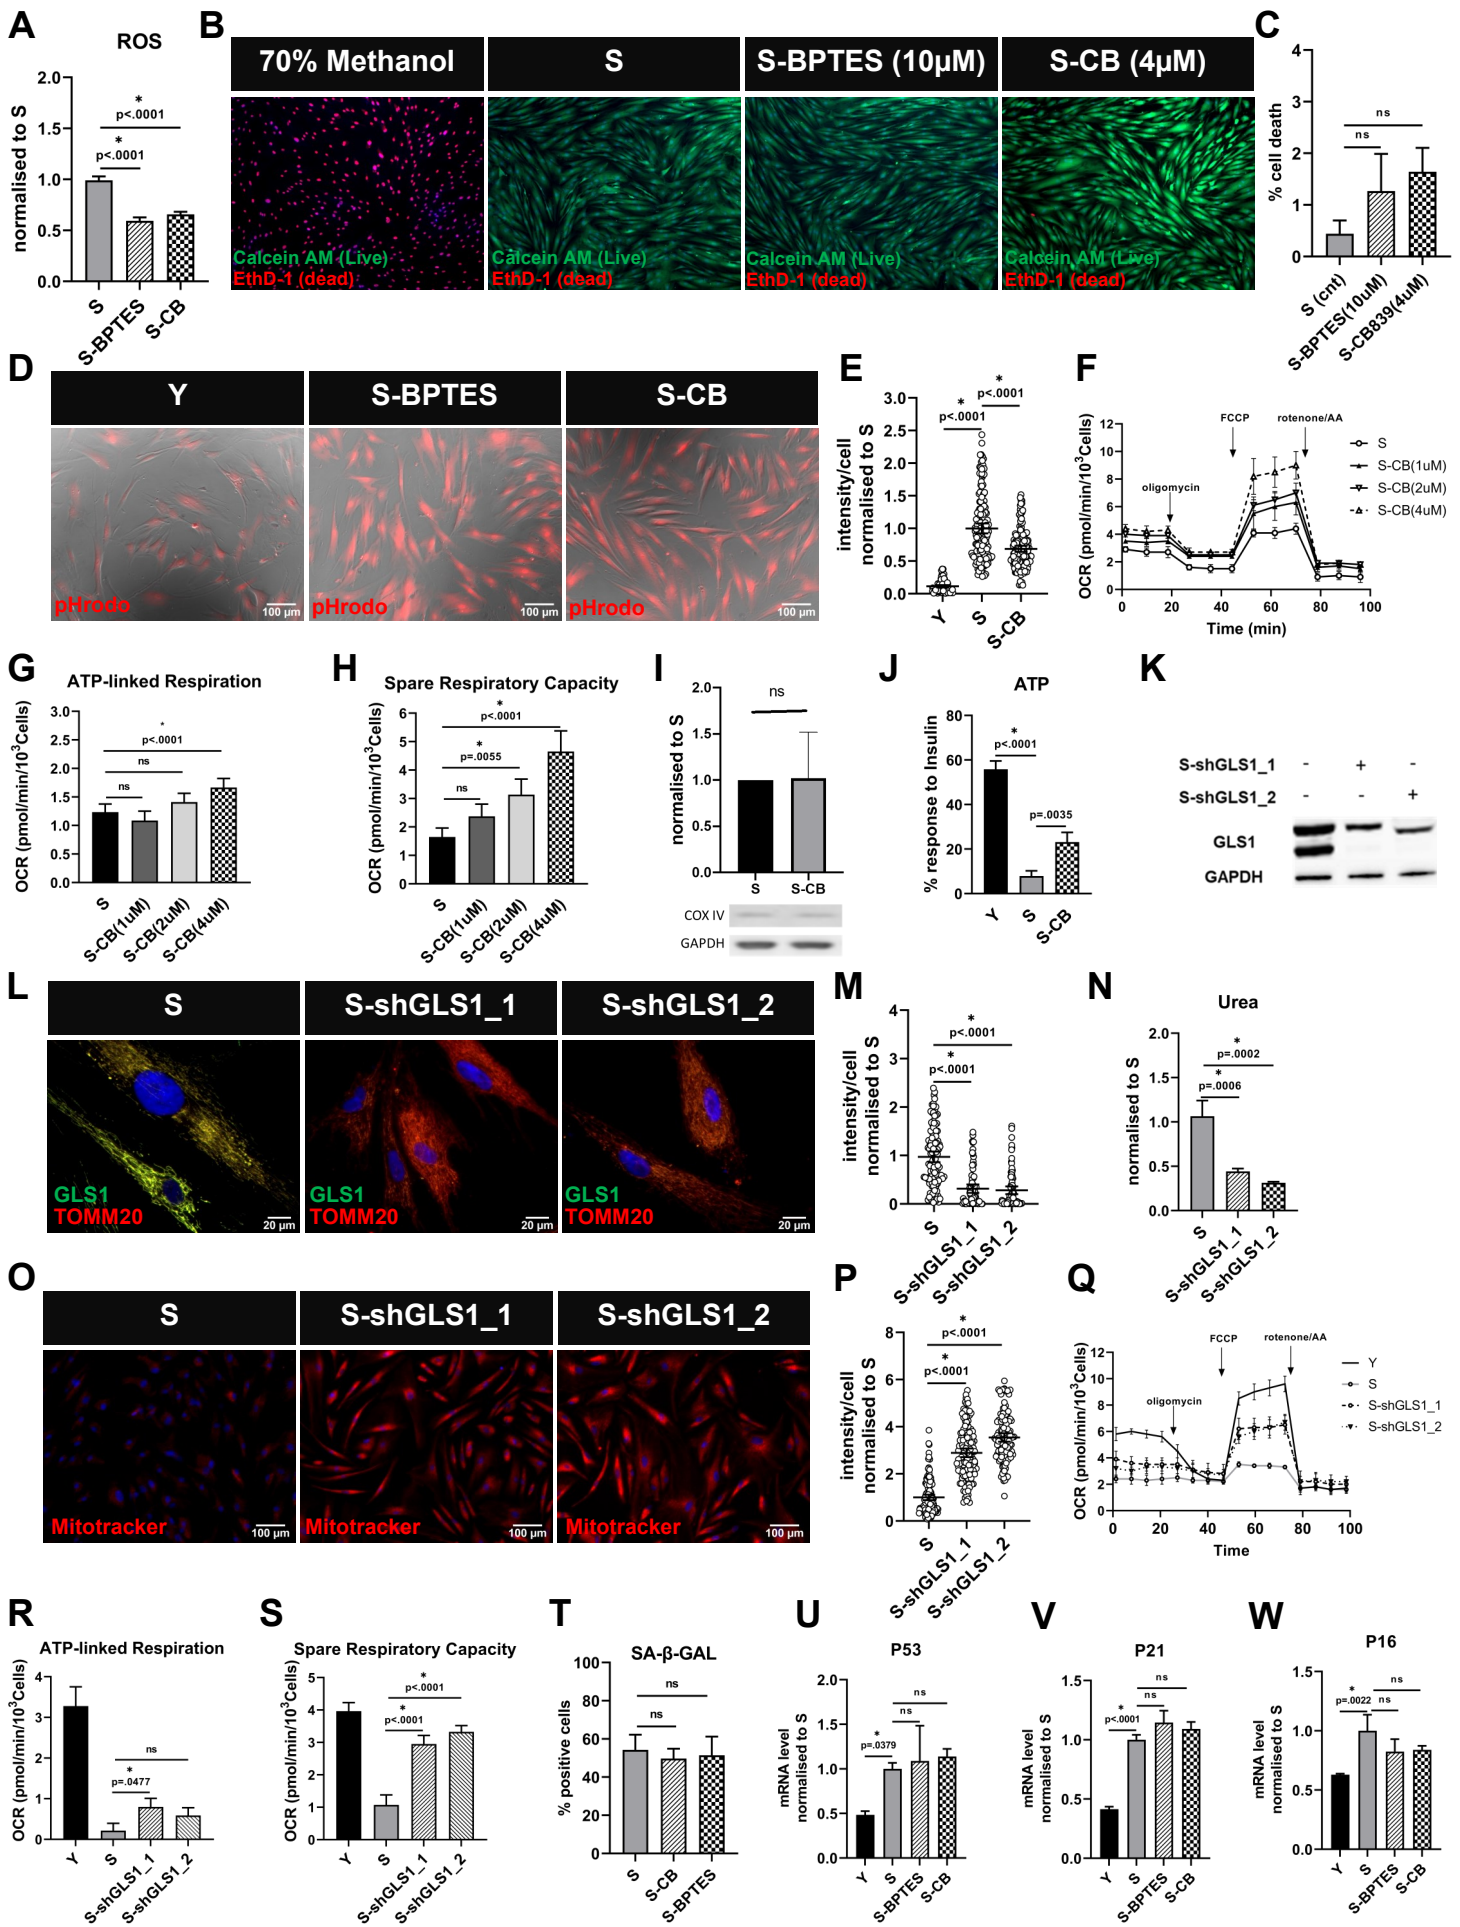

**Figure S7. Inhibition of GLS1 activity in senescent MSC restores mitochondrial function. Related to Figure 6.**

(A) Measurement of ROS in S, S-BPTES and S-CB cells using DCFDA dye; data shown as mean  $\pm$  SD. (B) Calcein AM (green, live cells) and ethidium homodimer (red, dead cells) staining of senescent MSCs, after treatment for 3 days with media containing GLS1 inhibitors. Methanol (70%) served as a positive control for non-viable cells, scale bar=200 $\mu$ M. (C) Quantification of percentage of cell viability; data shown as mean  $\pm$  SD, n>200 cells, from 6 fields of view. (D) Measurement of intracellular pH using pHrodo Red AM intracellular pH indicator, scale bar=100  $\mu$ M. (E) Quantification of pHrodo Red AM intensity per cell, normalised to S; data shown as mean  $\pm$  95%CI for >200 cells. (F) Measurement of oxygen consumption (OCR) using Seahorse extracellular flux analyzer of S cells after treatment with the indicated concentrations of GLS1 inhibitor, CB-839 for 10 days. (G) Calculations of ATP-linked respiration and (H) Spare Respiratory Capacity based on OCR data, demonstrating increased mitochondrial function after CB-839 treatment. (I) Western blot analysis for COX IV. (J) Intracellular ATP concentration measured in Y, S and S-CB (4 $\mu$ M) cells in response to insulin stimulation for 24 hours; data shown as mean  $\pm$  SD. (K) WB for GLS1 of control cells or cells in which GLS1 was knocked down using the indicated shRNA. (L) Co-stain for GLS1 and TOMM20 (mitochondrial membrane protein) in senescent and GLS1 knocked down senescent cells, scale bar=20 $\mu$ M. (M) Quantification of GLS1 intensity, normalised to S cells, demonstrating efficient GLS1 knockdown; data shown as mean  $\pm$  95%CI for >100 cells. (N) Measurement of intracellular urea concentration normalised to S; represented as mean  $\pm$  SD. (O) Representative images of Mitotracker Red live stain; scale bar=100 $\mu$ m. (P) Quantification of Mitotracker Red intensity per cell, normalised to S; data shown as mean  $\pm$  95%CI for >200 cells. (Q) Measurement of oxygen consumption rate (OCR) using Seahorse extracellular flux analyzer. (R) ATP-linked Respiration and (S) Spare Respiratory Capacity calculated from the OCR data in (Q); data shown as mean  $\pm$  SD. (T) Percentage of senescent cells shown by SA- $\beta$ -gal quantification; data presented as mean  $\pm$  SD, n = 3 independent experiments. (U-W) Quantification of gene expression of cell cycle inhibitors *P53*, *P21* and *P16* via quantitative PCR normalised to S and internally normalised to *RPL32* cycle number; data shown as mean  $\pm$  SD.

**Table S1. Primers used in real time PCR. Related to Star Methods**

| <b>Human Gene</b> | <b>Forward (5'-3')</b>    | <b>Reverse (3'-5')</b>  |
|-------------------|---------------------------|-------------------------|
| GLUT1             | TCTGGCATCAACGCTGTCTTC     | CGATACCGGAGCCAATGGT     |
| GLUT3             | GCTGGGCATCGTTGTTGGA       | GCACTTTGTAGGATAGCAGGAAG |
| GLUT4             | ATCCTTGGACGATTCCTCATTGG   | CAGGTGAGTGGGAGCAATCT    |
| GLS1              | CGAAGATTTGCTTTGTCAGCTATGG | CTCTGCAGCAGCTACATGGA    |
| SLC14A1           | GATTCTCCGGGGCATATCCC      | CCAGGGGTTCTGAACAAGAAG   |
| IL1 $\alpha$      | CACGGCTGCTGCATTACATA      | AGAGGAGGTTGGTCTCACTA    |
| IL1 $\beta$       | GATGCACCTGTACGATCACT      | ACGCAGGACAGGTACAGATT    |
| IL6               | GAGGAGACTTGCCTGGTGAA      | TGGACTGCAGGAACTCCTTA    |
| IL8               | TTGGCAGCCTTCCTGATTTTC     | TCTTTAGCACTCCTTGCCAAAAC |
| P21               | CCGCGACTGTGATGCGCTAA      | TGCAGCAGAGCAGGTGAGGT    |
| P53               | GGCCATCTACAAGCAGTCAC      | GGATGGTGGTACAGTCAGAG    |
| P16               | CTTCCTGGACACGCTGGT        | GCATGGTTACTGCCTCTGGT    |

**Table S2. Antibody dilution and application. Related to Star Methods**

| <b>Antibody</b>                                       | <b>Application</b> | <b>Dilution</b>      |
|-------------------------------------------------------|--------------------|----------------------|
| Cytochrome C                                          | ICC                | 1/200                |
| COX IV                                                | WB, ICC, IHC       | 1/1000, 1/200, 1/200 |
| PDHA1 (phosphor S293)                                 | ICC                | 1/200                |
| KGA/GAC                                               | WB, ICC, IHC       | 1/1000, 1/200, 1/200 |
| Phospho-Histone H2A.X<br>(Ser139)                     | ICC                | 1/200                |
| Tomm20                                                | ICC                | 1/200                |
| Cytokeratin 14                                        | IHC                | 1/100                |
| Laminin                                               | IHC                | 1/100                |
| Goat anti-rabbit/anti-mouse<br>IgG Secondary Antibody | ICC, IHC           | 1/200                |
| Hoechst 33342                                         | ICC, IHC           | 1/200                |
| p-SAPK/JNK                                            | WB                 | 1/1000               |
| SAPK/JNK                                              | WB                 | 1/1000               |
| p-P38                                                 | WB                 | 1/1000               |
| P38                                                   | WB                 | 1/1000               |
| p-ERK1/2                                              | WB                 | 1/1000               |
| ERK1/2                                                | WB                 | 1/1000               |
| JNK1                                                  | WB                 | 1/500                |
| JNK2                                                  | WB                 | 1/1000(WB)           |
| NANOG                                                 | ICC                | 1/1000               |
| GAPDH                                                 | WB                 | 1/10000              |
| anti-rabbit IgG HRP linked                            | WB                 | 1/1000(WB)           |
| anti-mouse IgG HRP linked                             | WB                 | 1/1000(WB)           |
